# Supplementary material
Source: PubMed Central journal article supplement (PMC10814505)
Supplement: Appendix_5_Chi_Square_Results_Table_8_Affiliative_Signs.pdf [file Appendix_5_Chi_Square_Results_Table_8_Affiliative_Signs.pdf]

*Supplementary Material – Appendix 5*

## Conflict and affiliative behavior frequency between cats in multiple cat households, a survey-based study

*Ashley L. Elzerman, Theresa L. DePorter, Alexandra Beck, Jean-François Collin*

### Chi Square Test of Independence (Results included in Table 8)

- S8.1 – Nose Touching and Home Size
- S8.2 – Nose Touching and Litterboxes
- S8.3 – Nose Touching and Food Stations
- S8.4 – Nose Touching and Scratching Posts
- S8.5 – Nose Touching and New cat added to house in the past 6 months
  
- S8.6 – Allogroom and Home Size
- S8.7 – Allogroom and Litterboxes
- S8.8 – Allogroom and Food Stations
- S8.9 – Allogroom and Scratching Posts
- S8.10 – Allogroom and New cat added to house in the past 6 months
  
- S8.11 – Sleep Same Room and Home Size
- S8.12 – Sleep Same Room and Litterboxes
- S8.13 – Sleep Same Room and Food Stations
- S8.14 – Sleep Same Room and Scratching Posts
- S8.15 – Sleep Same Room and New cat added to house in the past 6 months
  
- S8.16 – Sleep Touching and Home Size
- S8.17 – Sleep Touching and Litterboxes
- S8.18 – Sleep Touching and Food Stations
- S8.19 – Sleep Touching and Scratching Posts
- S8.20 – Sleep Touching and New cat added to house in the past 6 months

**Table S8.1 – Nose Touching and Home Size**  
*Observed and Expected Frequencies*

| Nose Touching        | Home_Size           |                       |                            | $\chi^2$ | df | p    |
|----------------------|---------------------|-----------------------|----------------------------|----------|----|------|
|                      | Less than 1499 sqft | 1500-3499 square feet | More than 3500 square feet |          |    |      |
| Never                | 120[122.19]         | 155[154.90]           | 15[12.92]                  | 4.35     | 8  | .824 |
| Once a month or less | 115[114.18]         | 149[144.75]           | 7[12.07]                   |          |    |      |
| Weekly               | 238[229.63]         | 283[291.10]           | 24[24.28]                  |          |    |      |
| Daily                | 326[327.38]         | 418[415.01]           | 33[34.61]                  |          |    |      |
| Several times a day  | 232[237.63]         | 302[301.25]           | 30[25.12]                  |          |    |      |

*Note.* Values formatted as Observed[Expected].

**Table S8.2 – Nose Touching and Litterboxes**  
*Observed and Expected Frequencies*

| Nose Touching        | Litterbox   |             | $\chi^2$ | df | p    |
|----------------------|-------------|-------------|----------|----|------|
|                      | FALSE       | TRUE        |          |    |      |
| Never                | 200[218.44] | 96[77.56]   | 11.23    | 4  | .024 |
| Once a month or less | 198[202.20] | 76[71.80]   |          |    |      |
| Weekly               | 409[410.31] | 147[145.69] |          |    |      |
| Daily                | 585[584.47] | 207[207.53] |          |    |      |
| Several times a day  | 447[423.59] | 127[150.41] |          |    |      |

*Note.* Values formatted as Observed[Expected].

**Table S8.3 – Nose Touching and Food Stations**  
*Observed and Expected Frequencies*

| Nose Touching        | Food        |             | $\chi^2$ | df | p    |
|----------------------|-------------|-------------|----------|----|------|
|                      | FALSE       | TRUE        |          |    |      |
| Never                | 92[110.70]  | 204[185.30] | 12.63    | 4  | .013 |
| Once a month or less | 90[102.48]  | 184[171.52] |          |    |      |
| Weekly               | 201[207.94] | 355[348.06] |          |    |      |
| Daily                | 314[296.21] | 478[495.79] |          |    |      |
| Several times a day  | 235[214.67] | 339[359.33] |          |    |      |

*Note.* Values formatted as Observed[Expected].

**Table S8.4 – Nose Touching and Scratching Posts**  
*Observed and Expected Frequencies*

| Nose Touching        | Scratch_Post |             | $\chi^2$ | df | p    |
|----------------------|--------------|-------------|----------|----|------|
|                      | FALSE        | TRUE        |          |    |      |
| Never                | 116[112.96]  | 180[183.04] | 2.40     | 4  | .663 |
| Once a month or less | 102[104.56]  | 172[169.44] |          |    |      |
| Weekly               | 223[212.18]  | 333[343.82] |          |    |      |
| Daily                | 304[302.24]  | 488[489.76] |          |    |      |
| Several times a day  | 206[219.05]  | 368[354.95] |          |    |      |

*Note.* Values formatted as Observed[Expected].

**Table S8.5 – Nose Touching and New cat added to house in the past 6 months**  
*Observed and Expected Frequencies*

| Nose Touching        | Time_Any_LessThan6mo |            | $\chi^2$ | df | p    |
|----------------------|----------------------|------------|----------|----|------|
|                      | No                   | Yes        |          |    |      |
| Never                | 267[261.08]          | 29[34.92]  | 6.39     | 4  | .172 |
| Once a month or less | 249[241.67]          | 25[32.33]  |          |    |      |
| Weekly               | 496[490.40]          | 60[65.60]  |          |    |      |
| Daily                | 691[698.56]          | 101[93.44] |          |    |      |
| Several times a day  | 495[506.28]          | 79[67.72]  |          |    |      |

*Note.* Values formatted as Observed[Expected].

**Table S8.6 – Allogroom and Home Size**  
*Observed and Expected Frequencies*

| Allogroom            | Home_Size           |                       |                            | $\chi^2$ | df | p    |
|----------------------|---------------------|-----------------------|----------------------------|----------|----|------|
|                      | Less than 1499 sqft | 1500-3499 square feet | More than 3500 square feet |          |    |      |
| Never                | 187[208.14]         | 281[263.86]           | 26[22.00]                  | 12.77    | 8  | .120 |
| Once a month or less | 118[109.55]         | 132[138.87]           | 10[11.58]                  |          |    |      |
| Weekly               | 168[186.23]         | 254[236.08]           | 20[19.69]                  |          |    |      |
| Daily                | 259[237.63]         | 279[301.25]           | 26[25.12]                  |          |    |      |
| Several times a day  | 299[289.46]         | 361[366.94]           | 27[30.60]                  |          |    |      |

*Note.* Values formatted as Observed[Expected].

**Table S8.7 – Allogroom and Litterboxes**  
*Observed and Expected Frequencies*

| Allogroom            | Litterbox   |             | $\chi^2$ | df | p      |
|----------------------|-------------|-------------|----------|----|--------|
|                      | FALSE       | TRUE        |          |    |        |
| Never                | 345[374.15] | 162[132.85] | 23.07    | 4  | < .001 |
| Once a month or less | 186[194.08] | 77[68.92]   |          |    |        |
| Weekly               | 317[329.87] | 130[117.13] |          |    |        |
| Daily                | 439[424.33] | 136[150.67] |          |    |        |
| Several times a day  | 552[516.57] | 148[183.43] |          |    |        |

*Note.* Values formatted as Observed[Expected].

**Table S8.8 – Allogroom and Food Stations**  
*Observed and Expected Frequencies*

| Allogroom            | Food        |             | $\chi^2$ | df | p      |
|----------------------|-------------|-------------|----------|----|--------|
|                      | FALSE       | TRUE        |          |    |        |
| Never                | 150[189.62] | 357[317.38] | 23.62    | 4  | < .001 |
| Once a month or less | 90[98.36]   | 173[164.64] |          |    |        |
| Weekly               | 165[167.18] | 282[279.82] |          |    |        |
| Daily                | 230[215.05] | 345[359.95] |          |    |        |
| Several times a day  | 297[261.80] | 403[438.20] |          |    |        |

*Note.* Values formatted as Observed[Expected].

**Table S8.9 – Allogroom and Scratching Posts**  
*Observed and Expected Frequencies*

| Allogroom            | Scratch_Post |             | $\chi^2$ | df | p    |
|----------------------|--------------|-------------|----------|----|------|
|                      | FALSE        | TRUE        |          |    |      |
| Never                | 202[193.48]  | 305[313.52] | 2.55     | 4  | .635 |
| Once a month or less | 95[100.37]   | 168[162.63] |          |    |      |
| Weekly               | 160[170.58]  | 287[276.42] |          |    |      |
| Daily                | 227[219.43]  | 348[355.57] |          |    |      |
| Several times a day  | 267[267.13]  | 433[432.87] |          |    |      |

*Note.* Values formatted as Observed[Expected].

**Table S8.10 – Allogroom and New cat added to house in the past 6 months**  
*Observed and Expected Frequencies*

| Allogroom            | Time_Any_LessThan6mo |            | $\chi^2$ | df | p      |
|----------------------|----------------------|------------|----------|----|--------|
|                      | No                   | Yes        |          |    |        |
| Never                | 442[447.19]          | 65[59.81]  | 25.11    | 4  | < .001 |
| Once a month or less | 247[231.97]          | 16[31.03]  |          |    |        |
| Weekly               | 411[394.26]          | 36[52.74]  |          |    |        |
| Daily                | 508[507.16]          | 67[67.84]  |          |    |        |
| Several times a day  | 590[617.42]          | 110[82.58] |          |    |        |

*Note.* Values formatted as Observed[Expected].

**Table S8.11 – Sleep Same Room and Home Size**  
*Observed and Expected Frequencies*

| Sleep_same_room      | Home_Size           |                       |                            | $\chi^2$ | df | p    |
|----------------------|---------------------|-----------------------|----------------------------|----------|----|------|
|                      | Less than 1499 sqft | 1500-3499 square feet | More than 3500 square feet |          |    |      |
| Never                | 22[23.17]           | 31[29.38]             | 2[2.45]                    | 13.55    | 8  | .094 |
| Once a month or less | 19[26.12]           | 41[33.12]             | 2[2.76]                    |          |    |      |
| Weekly               | 57[73.73]           | 108[93.47]            | 10[7.80]                   |          |    |      |
| Daily                | 309[311.79]         | 400[395.25]           | 31[32.96]                  |          |    |      |
| Several times a day  | 624[596.19]         | 727[755.78]           | 64[63.03]                  |          |    |      |

*Note.* Values formatted as Observed[Expected].

**Table S8.12 – Sleep Same Room and Litterboxes**  
*Observed and Expected Frequencies*

| Sleep Same Room      | Litterbox     |             | $\chi^2$ | df | p      |
|----------------------|---------------|-------------|----------|----|--------|
|                      | FALSE         | TRUE        |          |    |        |
| Never                | 31[42.06]     | 26[14.94]   | 27.76    | 4  | < .001 |
| Once a month or less | 41[47.23]     | 23[16.77]   |          |    |        |
| Weekly               | 123[134.31]   | 59[47.69]   |          |    |        |
| Daily                | 535[552.73]   | 214[196.27] |          |    |        |
| Several times a day  | 1109[1062.66] | 331[377.34] |          |    |        |

*Note.* Values formatted as Observed[Expected].

**Table S8.13 – Sleep Same Room and Food Stations**  
*Observed and Expected Frequencies*

| Sleep Same Room      | Food        |             | $\chi^2$ | df | p      |
|----------------------|-------------|-------------|----------|----|--------|
|                      | FALSE       | TRUE        |          |    |        |
| Never                | 10[21.32]   | 47[35.68]   | 22.03    | 4  | < .001 |
| Once a month or less | 19[23.94]   | 45[40.06]   |          |    |        |
| Weekly               | 50[68.07]   | 132[113.93] |          |    |        |
| Daily                | 282[280.12] | 467[468.88] |          |    |        |
| Several times a day  | 571[538.56] | 869[901.44] |          |    |        |

*Note.* Values formatted as Observed[Expected].

**Table S8.14 – Sleep Same Room and Scratching Posts**  
*Observed and Expected Frequencies*

| Sleep Same Room      | Scratch_Post |             | $\chi^2$ | df | p    |
|----------------------|--------------|-------------|----------|----|------|
|                      | FALSE        | TRUE        |          |    |      |
| Never                | 24[21.75]    | 33[35.25]   | 7.02     | 4  | .135 |
| Once a month or less | 22[24.42]    | 42[39.58]   |          |    |      |
| Weekly               | 85[69.46]    | 97[112.54]  |          |    |      |
| Daily                | 285[285.83]  | 464[463.17] |          |    |      |
| Several times a day  | 535[549.53]  | 905[890.47] |          |    |      |

*Note.* Values formatted as Observed[Expected].

**Table S8.15 – Sleep Same Room and New cat added to house in the past 6 months**  
*Observed and Expected Frequencies*

| Sleep Same Room      | Time_Any_LessThan6mo |             | $\chi^2$ | df | p    |
|----------------------|----------------------|-------------|----------|----|------|
|                      | No                   | Yes         |          |    |      |
| Never                | 47[50.28]            | 10[6.72]    | 9.43     | 4  | .051 |
| Once a month or less | 57[56.45]            | 7[7.55]     |          |    |      |
| Weekly               | 163[160.53]          | 19[21.47]   |          |    |      |
| Daily                | 680[660.63]          | 69[88.37]   |          |    |      |
| Several times a day  | 1251[1270.11]        | 189[169.89] |          |    |      |

*Note.* Values formatted as Observed[Expected].

**Table S8.16 – Sleep Touching and Home Size**  
*Observed and Expected Frequencies*

| Sleep Touching       | Home_Size           |                       |                            | $\chi^2$ | df | p    |
|----------------------|---------------------|-----------------------|----------------------------|----------|----|------|
|                      | Less than 1499 sqft | 1500-3499 square feet | More than 3500 square feet |          |    |      |
| Never                | 211[240.16]         | 334[304.45]           | 25[25.39]                  | 11.10    | 8  | .196 |
| Once a month or less | 165[157.58]         | 193[199.76]           | 16[16.66]                  |          |    |      |
| Weekly               | 179[173.17]         | 214[219.52]           | 18[18.31]                  |          |    |      |
| Daily                | 198[187.91]         | 233[238.22]           | 15[19.87]                  |          |    |      |
| Several times a day  | 278[272.18]         | 333[345.04]           | 35[28.78]                  |          |    |      |

*Note.* Values formatted as Observed[Expected].

**Table S8.17 – Sleep Touching and Litterboxes**  
*Observed and Expected Frequencies*

| Sleep Touching       | Litterbox   |             | $\chi^2$ | df | p      |
|----------------------|-------------|-------------|----------|----|--------|
|                      | FALSE       | TRUE        |          |    |        |
| Never                | 392[429.49] | 190[152.51] | 21.04    | 4  | < .001 |
| Once a month or less | 272[280.43] | 108[99.57]  |          |    |        |
| Weekly               | 317[308.47] | 101[109.53] |          |    |        |
| Daily                | 348[335.77] | 107[119.23] |          |    |        |
| Several times a day  | 510[484.84] | 147[172.16] |          |    |        |

*Note.* Values formatted as Observed[Expected].

**Table S8.18 – Sleep Touching and Food Stations**  
*Observed and Expected Frequencies*

| Sleep Touching       | Food        |             | $\chi^2$ | df | p      |
|----------------------|-------------|-------------|----------|----|--------|
|                      | FALSE       | TRUE        |          |    |        |
| Never                | 177[217.67] | 405[364.33] | 34.72    | 4  | < .001 |
| Once a month or less | 129[142.12] | 251[237.88] |          |    |        |
| Weekly               | 146[156.33] | 272[261.67] |          |    |        |
| Daily                | 181[170.17] | 274[284.83] |          |    |        |
| Several times a day  | 299[245.72] | 358[411.28] |          |    |        |

*Note.* Values formatted as Observed[Expected].

**Table S8.19 – Sleep Touching and Scratching Posts**  
*Observed and Expected Frequencies*

| Sleep Touching       | Scratch_Post |             | $\chi^2$ | df | p    |
|----------------------|--------------|-------------|----------|----|------|
|                      | FALSE        | TRUE        |          |    |      |
| Never                | 231[222.10]  | 351[359.90] | 7.20     | 4  | .126 |
| Once a month or less | 123[145.02]  | 257[234.98] |          |    |      |
| Weekly               | 156[159.52]  | 262[258.48] |          |    |      |
| Daily                | 182[173.64]  | 273[281.36] |          |    |      |
| Several times a day  | 259[250.73]  | 398[406.27] |          |    |      |

*Note.* Values formatted as Observed[Expected].

**Table S8.20 – Sleep Touching and New cat added to house in the past 6 months**  
*Observed and Expected Frequencies*

| Signs_A_sleep_touching | Time_Any_LessThan6mo |            | $\chi^2$ | df | p      |
|------------------------|----------------------|------------|----------|----|--------|
|                        | No                   | Yes        |          |    |        |
| Never                  | 524[513.34]          | 58[68.66]  | 23.97    | 4  | < .001 |
| Once a month or less   | 355[335.17]          | 25[44.83]  |          |    |        |
| Weekly                 | 370[368.69]          | 48[49.31]  |          |    |        |
| Daily                  | 398[401.32]          | 57[53.68]  |          |    |        |
| Several times a day    | 551[579.49]          | 106[77.51] |          |    |        |

*Note.* Values formatted as Observed[Expected].
