# Supplementary material
Source: PubMed Central journal article supplement (PMC10814505)
Supplement: Appendix_6_Chi_Square_Results_Table_10_Intro.pdf [file Appendix_6_Chi_Square_Results_Table_10_Intro.pdf]

*Supplementary Material – Appendix 6*

**Conflict and affiliative behavior frequency between cats in multiple cat households, a survey-based study**

*Ashley L. Elzerman, Theresa L. DePorter, Alexandra Beck, Jean-François Collin*

**Chi Square Test of Independence (Results included in Table 10)**

- S10.1 – Flee and Introduction
- S10.2 – Chase and Introduction
- S10.3 – Stalk and Introduction
- S10.4 – Stare and Introduction
- S10.5 – Hiss and Introduction
- S10.6 – Twitch Tail and Introduction
- S10.7 – Wail and Introduction
  
- S10.8 – Nose Touching and Introduction
- S10.9 – Allogroom and Introduction
- S10.10 – Sleep Same Room and Introduction
- S10.11 – Sleep Touching and Introduction

**Table S10.1 – Flee and Introduction**

*Observed and Expected Frequencies*

| Flee                 | Intro_C2_to_House |            | $\chi^2$ | df | p      |
|----------------------|-------------------|------------|----------|----|--------|
|                      | Good              | Bad        |          |    |        |
| Never                | 402[354.99]       | 70[117.01] | 43.52    | 4  | < .001 |
| Once a month or less | 196[196.30]       | 65[64.70]  |          |    |        |
| Weekly               | 223[237.67]       | 93[78.33]  |          |    |        |
| Daily                | 193[216.61]       | 95[71.39]  |          |    |        |
| Several times a day  | 57[65.43]         | 30[21.57]  |          |    |        |

*Note.* Values formatted as Observed[Expected].

**Table S10.2 – Chase and Introduction**

*Observed and Expected Frequencies*

| Chase                | Intro_C2_to_House |             | $\chi^2$ | df | p    |
|----------------------|-------------------|-------------|----------|----|------|
|                      | Good              | Bad         |          |    |      |
| Never                | 210[189.53]       | 42[62.47]   | 12.17    | 4  | .016 |
| Once a month or less | 153[150.42]       | 47[49.58]   |          |    |      |
| Weekly               | 294[306.11]       | 113[100.89] |          |    |      |
| Daily                | 303[311.37]       | 111[102.63] |          |    |      |
| Several times a day  | 111[113.57]       | 40[37.43]   |          |    |      |

*Note.* Values formatted as Observed[Expected].

**Table S10.3 – Stalk and Introduction**  
*Observed and Expected Frequencies*

| Stalk                | Intro_C2_to_House |            | $\chi^2$ | df | p      |
|----------------------|-------------------|------------|----------|----|--------|
|                      | Good              | Bad        |          |    |        |
| Never                | 327[301.59]       | 74[99.41]  | 21.38    | 4  | < .001 |
| Once a month or less | 173[165.46]       | 47[54.54]  |          |    |        |
| Weekly               | 264[267.00]       | 91[88.00]  |          |    |        |
| Daily                | 224[248.95]       | 107[82.05] |          |    |        |
| Several times a day  | 83[88.00]         | 34[29.00]  |          |    |        |

*Note.* Values formatted as Observed[Expected].

**Table S10.4 – Stare and Introduction**  
*Observed and Expected Frequencies*

| Stare                | Intro_C2_to_House |             | $\chi^2$ | df | p      |
|----------------------|-------------------|-------------|----------|----|--------|
|                      | Good              | Bad         |          |    |        |
| Never                | 280[251.20]       | 54[82.80]   | 24.65    | 4  | < .001 |
| Once a month or less | 153[145.16]       | 40[47.84]   |          |    |        |
| Weekly               | 221[225.63]       | 79[74.37]   |          |    |        |
| Daily                | 295[316.64]       | 126[104.36] |          |    |        |
| Several times a day  | 122[132.37]       | 54[43.63]   |          |    |        |

*Note.* Values formatted as Observed[Expected].

**Table S10.5 – Hiss and Introduction**  
*Observed and Expected Frequencies*

| Hiss                 | Intro_C2_to_House |            | $\chi^2$ | df | p      |
|----------------------|-------------------|------------|----------|----|--------|
|                      | Good              | Bad        |          |    |        |
| Never                | 458[409.90]       | 87[135.10] | 71.81    | 4  | < .001 |
| Once a month or less | 309[303.85]       | 95[100.15] |          |    |        |
| Weekly               | 193[206.08]       | 81[67.92]  |          |    |        |
| Daily                | 90[117.33]        | 66[38.67]  |          |    |        |
| Several times a day  | 21[33.84]         | 24[11.16]  |          |    |        |

*Note.* Values formatted as Observed[Expected].

**Table S10.6 – Twitch Tail and Introduction**  
*Observed and Expected Frequencies*

| Twitch Tail          | Intro_C2_to_House |            | $\chi^2$ | df | p      |
|----------------------|-------------------|------------|----------|----|--------|
|                      | Good              | Bad        |          |    |        |
| Never                | 343[315.88]       | 77[104.12] | 24.43    | 4  | < .001 |
| Once a month or less | 243[233.15]       | 67[76.85]  |          |    |        |
| Weekly               | 276[288.81]       | 108[95.19] |          |    |        |
| Daily                | 161[175.99]       | 73[58.01]  |          |    |        |
| Several times a day  | 48[57.16]         | 28[18.84]  |          |    |        |

*Note.* Values formatted as Observed[Expected].

**Table S10.7 – Wail and Introduction**  
*Observed and Expected Frequencies*

| Wail                 | Intro_C2_to_House |             | $\chi^2$ | df | p    |
|----------------------|-------------------|-------------|----------|----|------|
|                      | Good              | Bad         |          |    |      |
| Never                | 825[802.50]       | 242[264.50] | 15.90    | 4  | .003 |
| Once a month or less | 139[148.17]       | 58[48.83]   |          |    |      |
| Weekly               | 73[78.97]         | 32[26.03]   |          |    |      |
| Daily                | 27[29.33]         | 12[9.67]    |          |    |      |
| Several times a day  | 7[12.03]          | 9[3.97]     |          |    |      |

*Note.* Values formatted as Observed[Expected].

**Table S10.8 – Nose Touching and Introduction**  
*Observed and Expected Frequencies*

| Nose Touching        | Intro_C2_to_House |            | $\chi^2$ | df | p      |
|----------------------|-------------------|------------|----------|----|--------|
|                      | Good              | Bad        |          |    |        |
| Never                | 138[174.49]       | 94[57.51]  | 47.93    | 4  | < .001 |
| Once a month or less | 136[146.66]       | 59[48.34]  |          |    |        |
| Weekly               | 247[235.41]       | 66[77.59]  |          |    |        |
| Daily                | 336[321.15]       | 91[105.85] |          |    |        |
| Several times a day  | 214[193.29]       | 43[63.71]  |          |    |        |

*Note.* Values formatted as Observed[Expected].

**Table S10.9 – Allogroom and Introduction**  
*Observed and Expected Frequencies*

| Allogroom            | Intro_C2_to_House |            | $\chi^2$ | df | p      |
|----------------------|-------------------|------------|----------|----|--------|
|                      | Good              | Bad        |          |    |        |
| Never                | 225[288.81]       | 159[95.19] | 83.36    | 4  | < .001 |
| Once a month or less | 126[126.35]       | 42[41.65]  |          |    |        |
| Weekly               | 213[196.30]       | 48[64.70]  |          |    |        |
| Daily                | 242[224.13]       | 56[73.87]  |          |    |        |
| Several times a day  | 265[235.41]       | 48[77.59]  |          |    |        |

*Note.* Values formatted as Observed[Expected].

**Table S10.10 – Sleep Same Room and Introduction**  
*Observed and Expected Frequencies*

| Sleep Same Room      | Intro_C2_to_House |             | $\chi^2$ | df | p      |
|----------------------|-------------------|-------------|----------|----|--------|
|                      | Good              | Bad         |          |    |        |
| Never                | 19[41.37]         | 36[13.63]   | 71.97    | 4  | < .001 |
| Once a month or less | 36[41.37]         | 19[13.63]   |          |    |        |
| Weekly               | 86[98.53]         | 45[32.47]   |          |    |        |
| Daily                | 336[339.20]       | 115[111.80] |          |    |        |
| Several times a day  | 594[550.54]       | 138[181.46] |          |    |        |

*Note.* Values formatted as Observed[Expected].

**Table S10.11 – Sleep Touching and Introduction**  
*Observed and Expected Frequencies*

| Sleep Touching       | Intro_C2_to_House |             | $\chi^2$ | df | p      |
|----------------------|-------------------|-------------|----------|----|--------|
|                      | Good              | Bad         |          |    |        |
| Never                | 269[327.92]       | 167[108.08] | 71.19    | 4  | < .001 |
| Once a month or less | 179[182.01]       | 63[59.99]   |          |    |        |
| Weekly               | 200[182.76]       | 43[60.24]   |          |    |        |
| Daily                | 176[160.20]       | 37[52.80]   |          |    |        |
| Several times a day  | 247[218.11]       | 43[71.89]   |          |    |        |

*Note.* Values formatted as Observed[Expected].
